# Supplementary material for: Catechin Versus MoS2 Nanoflakes Functionalized with Catechin: Improving the Sperm Fertilizing Ability—An In Vitro Study in a Swine Model
Source: MDPI journal article supplement (doi:10.3390/ijms24054788), 2023-03-01
Supplement: s1 [file s1]

Supplementary Materials S1

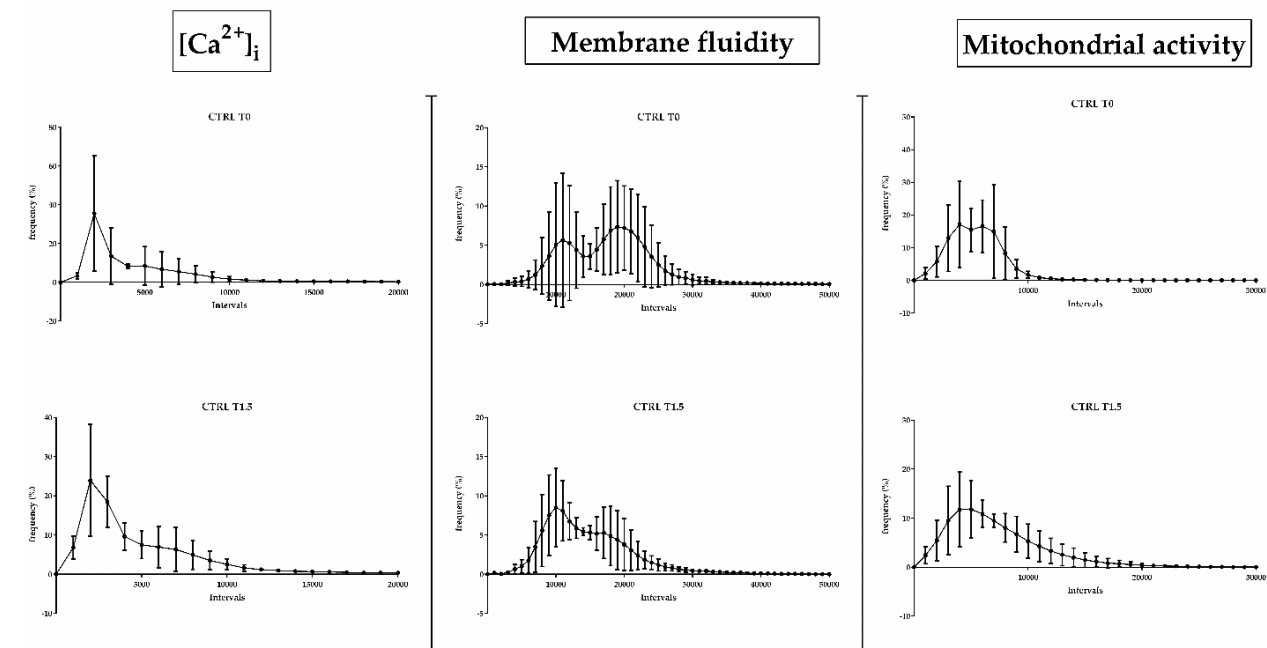

**Supplementary Materials S1.** CTRL group flow cytometry analysis after 0, 1.5 of capacitation.

## Supplementary Materials S2

All full-length membranes and immunoblotting images from three independent experiments.

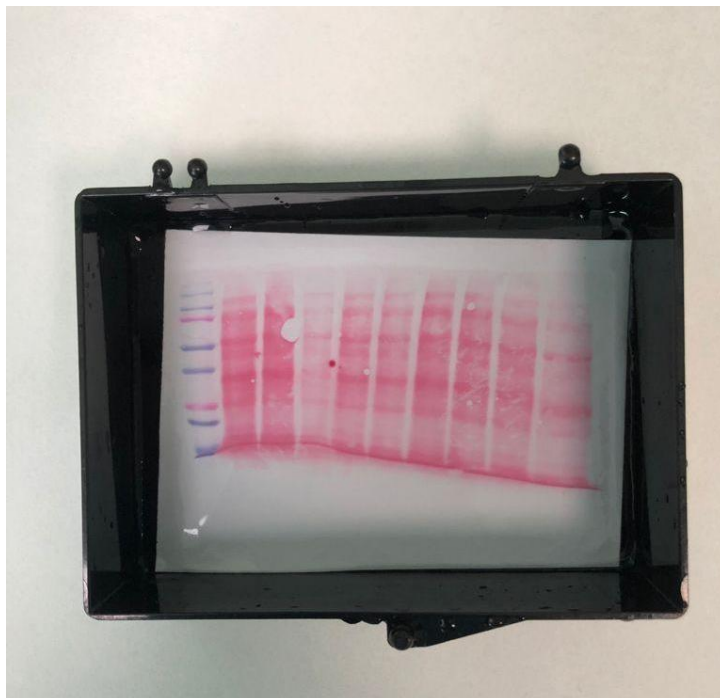

**Supplementary Figure S1.** Representative image of a membrane prior to hybridization. Blots used were mini size. This figure shows a membrane after Ponceau staining and prior to the incubation with the corresponding antibody

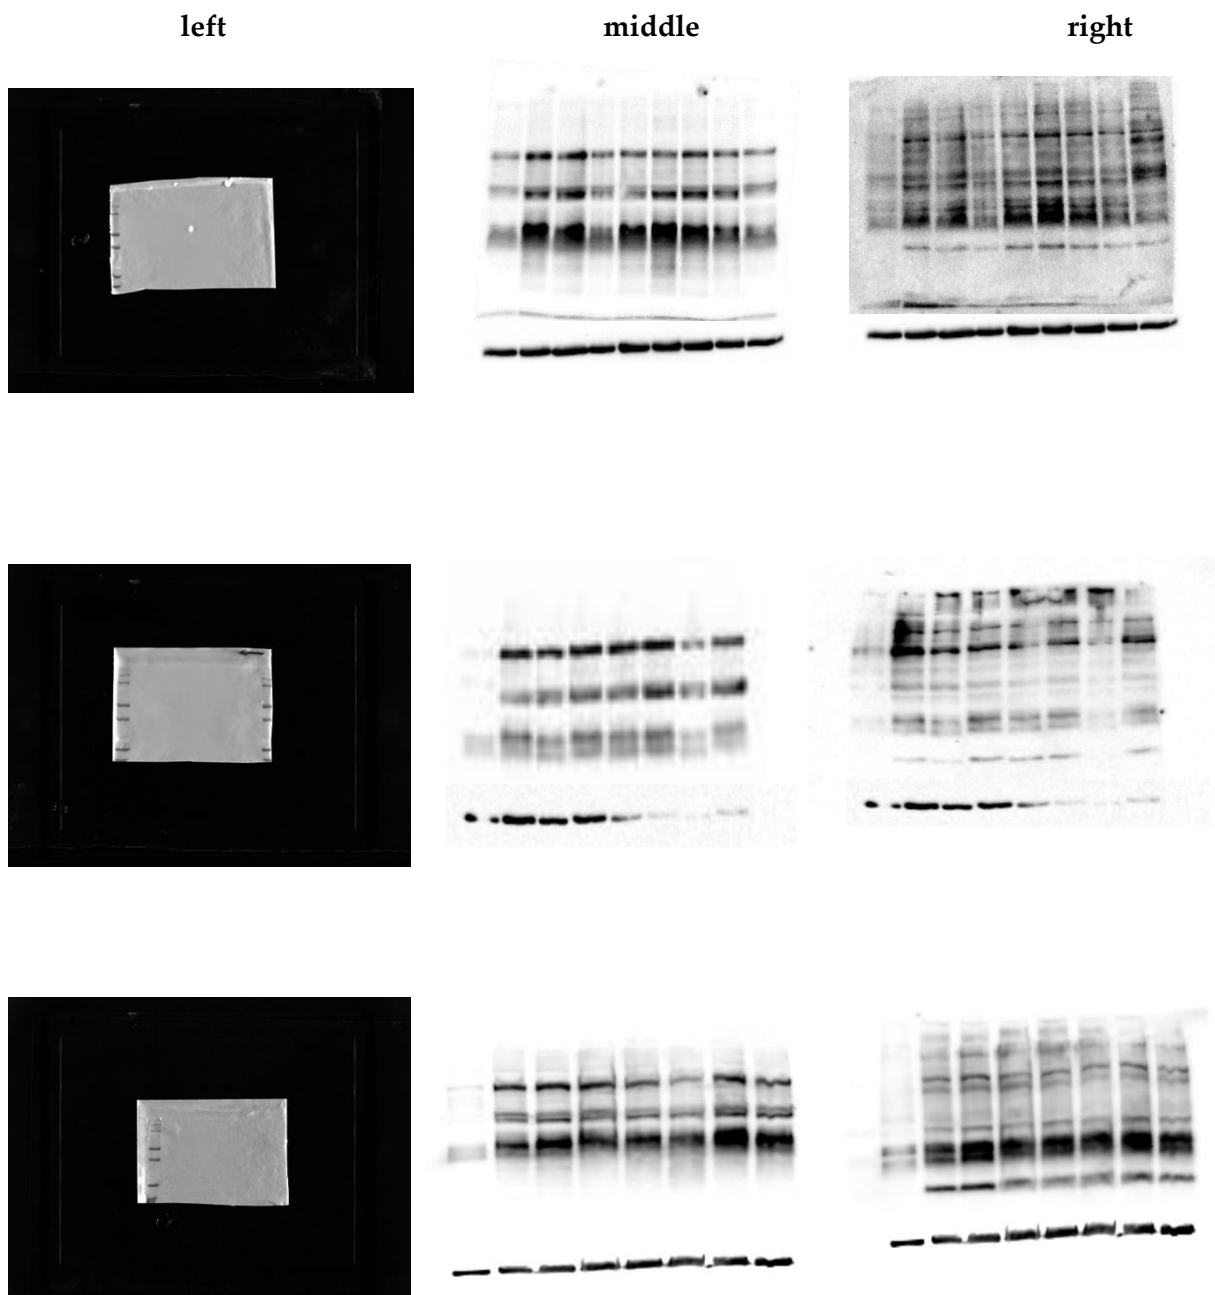

**Supplementary Figure S2.** Three representative blots with full-length membranes and membrane edges for anti-phospho-pKa antibody (Cell Signaling, Leiden, The Netherlands) and anti-phosphotyrosine antibody (Merck Millipore, USA). Left: molecular weight; middle: PKA activity and right: tyrosine phosphorylation patterns.
